# Supplementary material
Source: PubMed Central journal article supplement (PMC9595883)
Supplement: NIHMS1842025-supplement-Supplemental_information.pdf [file NIHMS1842025-supplement-Supplemental_information.pdf]

**Supplemental Information for:**  
**Molecular Analysis of pSK1 *par*: A Novel Plasmid Partitioning  
System Encoded by Staphylococcal Multiresistance Plasmids**

Helena Y. Chan<sup>1</sup>, Slade O. Jensen<sup>2-3</sup>, Rebecca J. LeBard<sup>1#</sup>, William A. Figgett<sup>1##</sup>,  
Evelyn Lai<sup>1</sup>, Alice E. Simpson<sup>1</sup>, Anthony J. Brzoska<sup>1</sup>, Danielle S. Davies<sup>1</sup>, Angela M.  
Connolly<sup>1</sup>, Stuart J. Cordwell<sup>1</sup>, Brady A. Travis<sup>4</sup>, Raul Salinas<sup>4</sup>, Ronald A. Skurray<sup>1</sup>,  
Neville Firth<sup>1</sup>, Maria A. Schumacher<sup>4,\*</sup>

*<sup>1</sup>School of Life and Environmental Sciences, University of Sydney, New South Wales 2006,  
Australia*

*<sup>2</sup>Microbiology and Infectious Diseases, School of Medicine, Western Sydney University, New  
South Wales 2751, Australia*

*<sup>3</sup>Antibiotic Resistance & Mobile Elements Group, Ingham Institute for Applied Medical  
Research, New South Wales 2170, Australia*

*<sup>4</sup>Department of Biochemistry, Duke University School of Medicine, Durham NC 27710, USA*

*#Current address: School of Biotechnology & Biomolecular Sciences, University of New South  
Wales, Sydney, New South Wales, Australia*

*##Current address: Garvan Institute of Medical Research, 384 Victoria St, Darlinghurst, New  
South Wales, 2010, Australia*

**\*Correspondence:** [Maria.schumacher@duke.edu](mailto:Maria.schumacher@duke.edu)



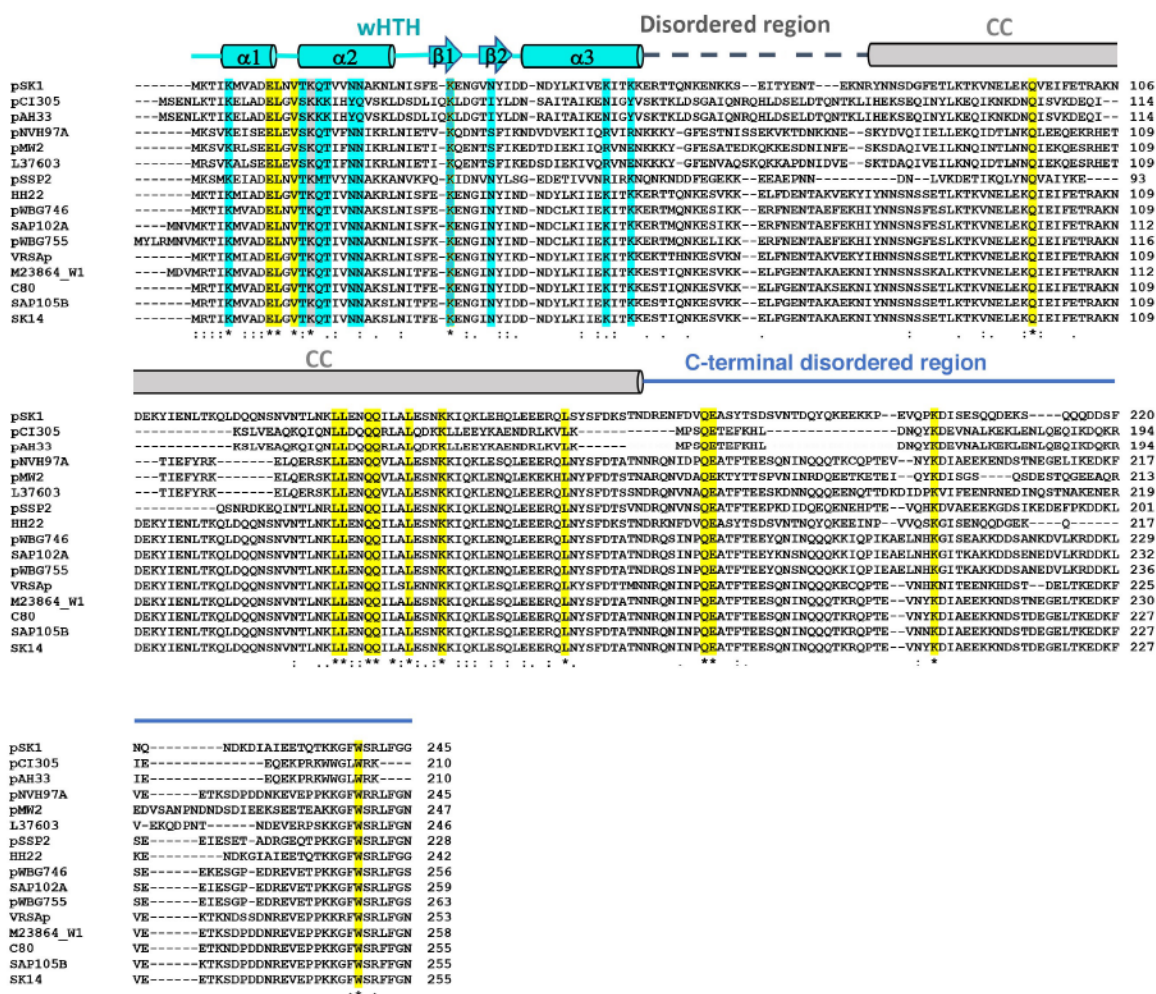

**Figure S2.** Sequence alignment of pSK1 Par homologs. The regions of the protein are labeled over the sequence, including the winged helix-turn-helix (wHTH), disordered region (that is subject to proteolysis), the putative coiled coil (CC) and the C-terminal disordered region. The secondary structural elements revealed in the crystal structure are shown within the wHTH. Invariant, conserved and somewhat conserved residues are indicated by asterisks, double circles and single circles, respectively, under the sequence. Residues in the wHTH that contact DNA are colored cyan (as a subunit in Figure 3A) except Lys15 which is colored grey. Invariant residues outside those contacting DNA are colored yellow.



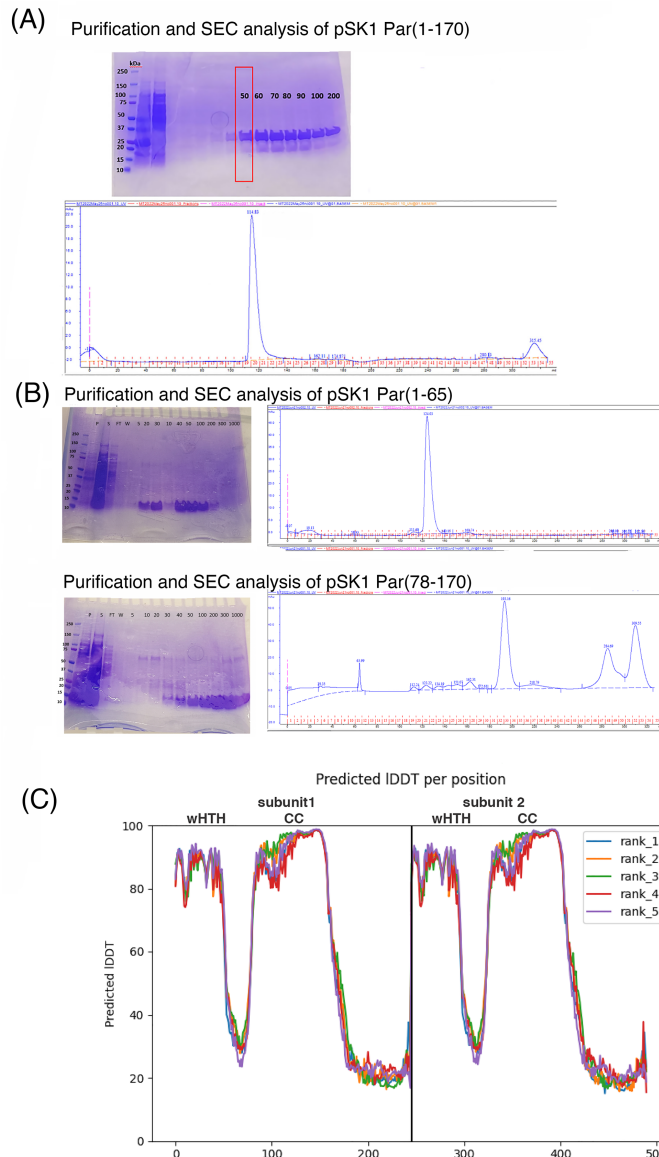

**Figure S4.** pSK1 Par oligomerization. **(A)** Purification and SEC analysis of pSK1 Par(1-170). SDS page shows purity of the protein, the band highlighted was used for SEC with an S75 column (Materials and methods). Based on calibration of standards the estimated MW is 90 kDa, which is most consistent with a dimer-of-dimer or tetramer. **(B)** Purification and SEC analysis of pSK1 Par(1-65) and Par(78-170). SDS page gels shows the purity of the proteins. SEC analyses provided estimated MWs of 65 and 12 kDa, respectively which is consistent with a monomeric wHTH (Par(1-65) and dimer-of-dimer or tetramer for pSK1 Par(78-170) (Note all these proteins contain a 20 residue N-terminal tag, which includes a His<sub>6</sub> tag). The MW of the latter may be higher due to shape (non-globular proteins exhibit larger MW than the globular equivalent). **(C)** Output from Alphafold 2 run with pSK1 Par (sequences linked to observe possible dimer prediction). Note residues 1-50 (labeled “wHTH”) and 78-180 (labeled “CC”) are predicted with high reliability (pLDDT >90%) for the two subunits of the dimer. The x and y axis indicate the Predicted IDDT and residue number (where subunit 2 is numbered consecutively after subunit 1 due to the linkage). Rank refers to the 5 models that were output in the run. Note all runs produced similar results and structures for the reliably predicted domains.

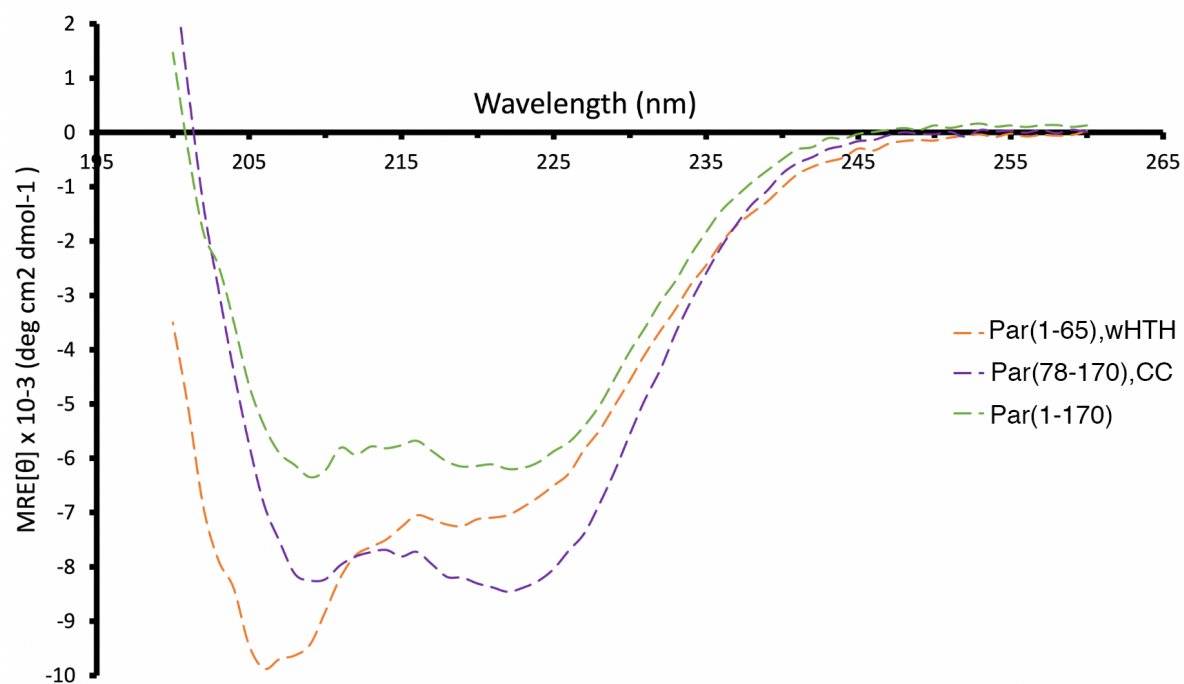

**Figure S5.** Far-UV CD spectra of pSK1 Par(1-170), pSK1 Par(1-65), and pSK1 Par(78-170). The samples were in a buffer consisting of 20 mM NaH<sub>2</sub>PO<sub>4</sub> (pH 7.5), 300 mM NaF, 5% glycerol, and 1 mM TCEP.

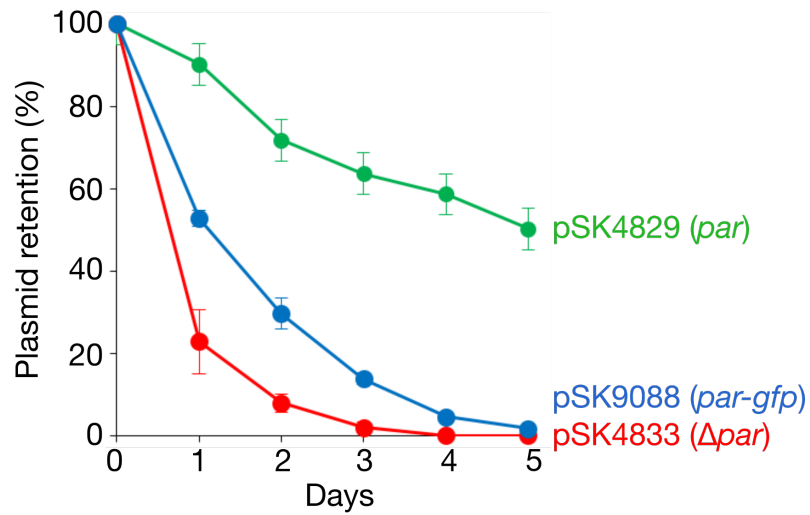

**Figure S6.** Plasmid segregational stability assay of a pSK1 minireplicon encoding Par-GFP in *S. aureus*. The retention of pSK1 minireplicons pSK4829 (*par*, green), pSK4833 ( $\Delta par$ , red) and pSK9088 ( $P_{par}::par-gfp$ , blue) was determined for five days of serial subculture ( $\sim 75$  generations) in the absence of selection. Each data point is the mean of three independent assays, each normalized to 100% plasmid retention on Day 0. Error bars indicate standard error of the mean.

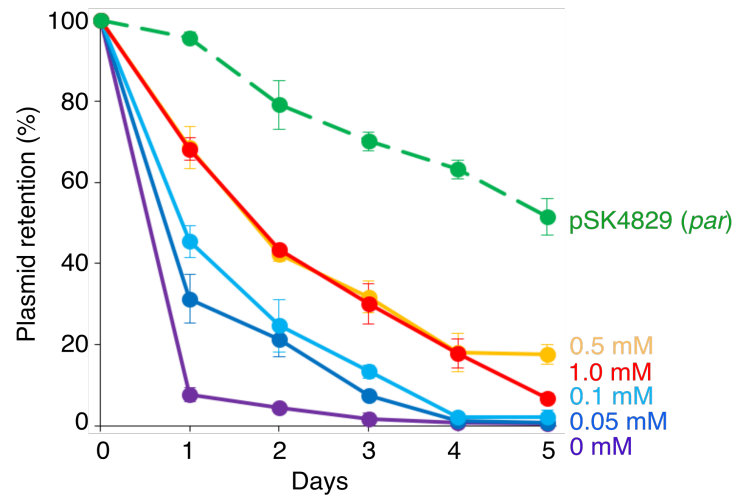

**Figure S7.** Segregational stability of pSK1 minireplicon pSK4833 ( $\Delta par$ ) in the presence of untagged Par, provided *in trans* from pSK9104 ( $P_{spac}::par$ ), induced with 0 mM (purple), 0.05 mM (dark blue), 0.1 mM (light blue), 0.5 mM (orange) or 1.0 mM (red) IPTG. Cells were subcultured for five days ( $\sim 75$  generations) in the presence of tetracycline (to maintain selection for pSK9104) and the appropriate concentration of IPTG. The segregational stability of pSK4829 is included as a reference. Each data point is the mean of three independent assays, each normalized to 100% plasmid retention on Day 0. Error bars indicate standard error of the mean.



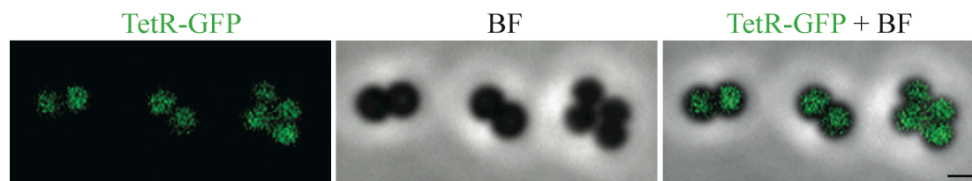

**Figure S8.** Fluorescence localization of TetR-GFP in the absence of *tetO* arrays. TetR-GFP expression was induced from pSK9142 ( $P_{spac}::tetR-gfp$ ) with 0.1 mM IPTG in *S. aureus* cells harboring a pSK1 minireplicon lacking *tetO* arrays (pSK4829, *par*). From left to right: TetR-GFP, bright-field (BF), and merge of TetR-GFP and BF channels. Scale bar = 1  $\mu$ m.

**Table S1. Bacterial strains, plasmids and oligonucleotides**

| Strain, plasmid or oligonucleotide | Genotype, relevant characteristics or sequence <sup>a</sup>                                                                                                                                                                    | Reference or source            |
|------------------------------------|--------------------------------------------------------------------------------------------------------------------------------------------------------------------------------------------------------------------------------|--------------------------------|
| <b><i>E. coli</i></b>              |                                                                                                                                                                                                                                |                                |
| DH5a                               | F- <i>endA hsdR17 supE44 thi-1 λ- recA1 gyrA96 relA1</i> ϕ80 <i>dLacZΔM15</i>                                                                                                                                                  | Bethesda Research Laboratories |
| M15                                | F- <i>thi- lac- ara+ gal+ mtl- recA+ uvr+ lon+</i>                                                                                                                                                                             | Qiagen                         |
| C41(DE3)                           | F- <i>ompT hsdSB (rB- mB-) gal dcm</i>                                                                                                                                                                                         | (6)                            |
| <b><i>S. aureus</i></b>            |                                                                                                                                                                                                                                |                                |
| RN4220                             | Restrictionless derivative of NCTC 8325-4                                                                                                                                                                                      | (7)                            |
| <b>Plasmids</b>                    |                                                                                                                                                                                                                                |                                |
| pJEG015                            | Ap <sup>R</sup> , Tc <sup>R</sup> , pLOW-GFP with <i>ermC</i> replaced by <i>tetA(K)</i>                                                                                                                                       | This study                     |
| pLAU44                             | Ap <sup>R</sup> , Gm <sup>R</sup> , pUC18 carrying an array of 120 copies of the 19-bp Tn10 <i>tetO</i> binding site separated by 10-bp random spacer sequence, flanking either side of a gentamicin resistance gene           | (8)                            |
| pLOW-GFP                           | Ap <sup>R</sup> , Em <sup>R</sup> , <i>E. coli</i> - <i>S. aureus</i> shuttle plasmid containing IPTG-inducible P <sub>spac</sub> promoter and <i>lacI</i> for controlled expression of <i>gfp</i> fusions in <i>S. aureus</i> | (9)                            |
| pQE-30                             | Ap <sup>R</sup> , <i>E. coli</i> expression vector containing IPTG-inducible T5 promoter and <i>lac</i> operator                                                                                                               | Qiagen                         |
| pRB394                             | Ap <sup>R</sup> , Nm <sup>R</sup> , pBR322 <i>ori</i> , pUB110 <i>ori</i> , MCS-promoterless <i>cat</i> gene from pUB112                                                                                                       | (10)                           |
| pREP4                              | Km <sup>R</sup> , <i>lac</i> repressor gene ( <i>lacI</i> )                                                                                                                                                                    | Qiagen                         |
| pSK1                               | <i>S. aureus</i> 28.2 kb multiresistance plasmid                                                                                                                                                                               | (11)                           |
| pSK4829                            | Ap <sup>R</sup> , Em <sup>R</sup> , pSK1 <i>par-rep</i> coding region cloned into the <i>Bam</i> HI and <i>Hind</i> III sites of pWE180                                                                                        | (12)                           |
| pSK4833                            | Ap <sup>R</sup> , Em <sup>R</sup> , pSK1 <i>rep</i> coding region cloned into the <i>Bam</i> HI and <i>Hind</i> III sites of pWE180                                                                                            | (12)                           |
| pSK5336                            | Ap <sup>R</sup> , Nm <sup>R</sup> , pSK1 <i>par-rep</i> intergenic region cloned into the <i>Bam</i> HI and <i>Hind</i> III sites of pRB394                                                                                    | This study                     |
| pSK5344                            | Ap <sup>R</sup> , pSK1 <i>par</i> coding region cloned into the <i>Bam</i> HI and <i>Hind</i> III sites of pQE-30                                                                                                              | This study                     |
| pSK6133                            | Ap <sup>R</sup> , Em <sup>R</sup> , pSK4829 site-directed mutant; -10 region of P <sub>mal</sub> changed to a <i>Sma</i> I site (see Figure 1A)                                                                                | This study                     |
| pSK6134                            | Ap <sup>R</sup> , Nm <sup>R</sup> , pSK5336 site-directed mutant; -10 region of P <sub>mal</sub> changed to a <i>Sma</i> I site (see Figure 1A)                                                                                | This study                     |
| pSK6137                            | Ap <sup>R</sup> , Em <sup>R</sup> , pSK4829 site-directed mutant; -10 region of P <sub>par-1</sub> changed to a <i>Sma</i> I site (see Figure 1A)                                                                              | This study                     |
| pSK6138                            | Ap <sup>R</sup> , Nm <sup>R</sup> , pSK5336 site-directed mutant; -10 region of P <sub>par-1</sub> changed to a <i>Sma</i> I site (see Figure 1A)                                                                              | This study                     |
| pSK6144                            | Ap <sup>R</sup> , Nm <sup>R</sup> , pSK1 <i>par</i> coding region and the upstream direct repeats cloned into the <i>Eco</i> RI and <i>Bam</i> HI sites of pRB394                                                              | This study                     |
| pSK6147                            | Ap <sup>R</sup> , Em <sup>R</sup> , pSK4829 site-directed mutant; -10 region of P <sub>par-2</sub> changed to a <i>Mlu</i> I site (see Figure 1A)                                                                              | This study                     |
| pSK6148                            | Ap <sup>R</sup> , Em <sup>R</sup> , pSK4829 site-directed mutant; -10 region of P <sub>par-3</sub> changed to a <i>Kpn</i> I site (see Figure 1A)                                                                              | This study                     |
| pSK6149                            | Ap <sup>R</sup> , Nm <sup>R</sup> , pSK5336 site-directed mutant; -10 region of P <sub>par-2</sub> changed to a <i>Mlu</i> I site (see Figure 1A)                                                                              | This study                     |
| pSK6150                            | Ap <sup>R</sup> , Nm <sup>R</sup> , pSK5336 site-directed mutant; -10 region of P <sub>par-3</sub> changed to a <i>Kpn</i> I site (see Figure 1A)                                                                              | This study                     |
| pSK6152                            | Ap <sup>R</sup> , Nm <sup>R</sup> , pSK6144 site-directed mutant; two stop codons (TAA and TGA) were substituted at the second and fourth codon positions of <i>par</i>                                                        | This study                     |
| pSK7721                            | Ap <sup>R</sup> , Em <sup>R</sup> , pSK4829 site-directed mutant; <i>par</i> loop-out deletion nucleotides 247-465 (aa 83-155; ΔCC)                                                                                            | This study                     |
| pSK7728                            | Ap <sup>R</sup> , pSK5344 site-directed mutant; <i>par</i> double point mutation TT395GC (L132A)                                                                                                                               | This study                     |
| pSK7764                            | Ap <sup>R</sup> , Em <sup>R</sup> , pSK4829 site-directed mutant; <i>par</i> double point mutation AA44GC (K15A)                                                                                                               | This study                     |
| pSK7766                            | Ap <sup>R</sup> , pSK5344 site-directed mutant; <i>par</i> double point mutation AA44GC (K15A)                                                                                                                                 | This study                     |
| pSK7767                            | Ap <sup>R</sup> , pSK5344 site-directed mutant; <i>par</i> loop-out deletion nucleotides 247-465 (aa 83-155; ΔCTD)                                                                                                             | This study                     |
| pSK9065                            | Ap <sup>R</sup> , Nm <sup>R</sup> , <i>E. coli</i> - <i>S. aureus</i> shuttle plasmid for controlled expression of <i>mRFPmars</i> fusions                                                                                     | (13)                           |
| pSK9067                            | Ap <sup>R</sup> , Em <sup>R</sup> , pLOW-GFP containing an additional <i>lacO<sub>3</sub></i> operator upstream of P <sub>spac</sub>                                                                                           | (13)                           |
| pSK9071                            | Ap <sup>R</sup> , pSK5344 site-directed mutant; <i>par</i> C-terminal deletion of nucleotides 511-738 (aa 171-245; ΔCTD)                                                                                                       | This study                     |

|         |                                                                                                                                                                                                                                                                      |            |
|---------|----------------------------------------------------------------------------------------------------------------------------------------------------------------------------------------------------------------------------------------------------------------------|------------|
| pSK9088 | Ap <sup>R</sup> , Em <sup>R</sup> , pSK1 <i>rep</i> and pSK1 <i>par-gfpmut-1</i> coding region cloned into the <i>Bam</i> HI and <i>Hind</i> III sites of pWE180. C-terminal Par-GFP fusion protein expressed from native pSK1 <i>par</i> promoter, P <sub>par</sub> | This study |
| pSK9102 | Ap <sup>R</sup> , Tc <sup>R</sup> , pSK1 <i>parK15A</i> and the native <i>par</i> RBS cloned into the <i>Sal</i> I and <i>Bam</i> HI sites of pJEG015 to generate a C-terminal <i>parK15A-gfp</i> fusion                                                             | This study |
| pSK9103 | Ap <sup>R</sup> , Tc <sup>R</sup> , pSK1 <i>parΔCC</i> and the native <i>par</i> RBS cloned into the <i>Sal</i> I and <i>Bam</i> HI sites of pJEG015 to generate a C-terminal <i>parΔCC-gfp</i> fusion                                                               | This study |
| pSK9104 | Ap <sup>R</sup> , Tc <sup>R</sup> , pSK1 <i>par</i> and the native <i>par</i> RBS, including stop codon, cloned into the <i>Sal</i> I and <i>Sma</i> I sites of pJEG015                                                                                              | This study |
| pSK9140 | Ap <sup>R</sup> , Nm <sup>R</sup> , <i>aadD</i> gene cloned into the <i>Kpn</i> I and <i>Cl</i> aI sites of pSK9067, replacing the <i>ermC</i> gene                                                                                                                  | This study |
| pSK9142 | Ap <sup>R</sup> , Nm <sup>R</sup> , Tn10 <i>tetR</i> cloned into the <i>Sal</i> I and <i>Bam</i> HI sites of pSK9140                                                                                                                                                 | This study |
| pSK9144 | Ap <sup>R</sup> , Em <sup>R</sup> , Tn10 <i>tetO</i> array cloned into the <i>Kas</i> I site of pSK4829                                                                                                                                                              | This study |
| pSK9145 | Ap <sup>R</sup> , Em <sup>R</sup> , Tn10 <i>tetO</i> array cloned into the <i>Kas</i> I site of pSK4833                                                                                                                                                              | This study |
| pWE180  | Ap <sup>R</sup> , Em <sup>R</sup> , pE194 erythromycin resistance gene ( <i>ermC</i> ) cloned into the blunted <i>Nde</i> I site of pUC18                                                                                                                            | (12)       |

#### Oligonucleotides<sup>b</sup>

|                 |                                                                       |            |
|-----------------|-----------------------------------------------------------------------|------------|
| 985EcoRI        | 5'-cgcg <u>aattc</u> ttagcaccacaaacaaacgactccagaagcc-3'               | This study |
| 988HindIII      | 5'-gcgaagc <u>ttt</u> tagccaccaacaaacg-3'                             | This study |
| 990BamHI        | 5'-tta <u>ggatc</u> ccaccacaaacaaacgactcc-3'                          | This study |
| 991HindIII      | 5'-gcgctgcagtca <u>agc</u> ttgcccacaaacaaacgactccagaagcc-3'           | This study |
| 994gfp          | 5'-catggaggcgcgcgaggagccaccaacaaacgactcc-3'                           | This study |
| 1217ΔCTDHindIII | 5'-gcgaagc <u>ttt</u> catcgcattagtagattatc-3'                         | This study |
| 1240ΔCC         | 5'-ggaataacttaattgtctctcgccatctgaattattatattcttttc-3'                 | This study |
| 1310L132A       | 5'-gctaaaattgttgattctctg <u>cta</u> atttattaatgtattaac-3'             | This study |
| 1346L132A       | 5'-gttaatacattaaataaattagcagagaatcaacaaatttagc-3'                     | This study |
| 1509ΔCC         | 5'-gaaaagaatagatataataattcagatggcagagacaattaagtattcc-3'               | This study |
| 1661BamHI       | 5'-gcggg <u>atcc</u> gcattattaacaacagtttg-3'                          | This study |
| 1661K15A        | 5'-gcattattaacaacagttt <u>g</u> tcagttacattcaattcatcag-3'             | This study |
| 1687EcoRI       | 5'-tacattcaattcatcagca <u>gaattctt</u> caagttacatcatccacccttag-3'     | This study |
| 1689            | 5'-cattcaattcatcagcaacc-3'                                            | This study |
| 1703K15A        | 5'-ctgatgaattgaatgtaact <u>gca</u> caactgttgaataatgc-3'               | This study |
| 1722BamHI       | 5'-cgcg <u>gatc</u> caaaactataaaaatggtgctgatg-3'                      | This study |
| 1725EcoRI       | 5'-cgcgca <u>attc</u> atgaaaactataaaaatgg-3'                          | This study |
| 1739SmaI        | 5'-ggcacctaattactacctac <u>ccggg</u> ccacctaacaattttctttcatc-3'       | This study |
| 1740EcoRI       | 5'-ctaagggtgatgatgtaaact <u>gaa</u> gattcttgctgatgaattgaatgta-3'      | This study |
| 1743SalI        | 5'-gatt <u>tcgact</u> gcctaagggtgatgatg-3'                            | This study |
| 1789SmaI        | 5'-gatgaaagaaaaattgtagtg <u>ccggg</u> taggtagtaaatagggtcc-3'          | This study |
| 1797MluI        | 5'-ccgccta <u>acgctt</u> cattttactacctaagtac-3'                       | This study |
| 1830MluI        | 5'-gtacttaggtagtaaaaatga <u>acgctt</u> taggcgg-3'                     | This study |
| 1900            | 5'-atcagaatcatgttatgacc-3'                                            | This study |
| 1963KpnI        | 5'-aagcaatgctattg <u>gtacc</u> gcacatcggtctggt-3'                     | This study |
| 1996KpnI        | 5'-accagagccgatgc <u>ggtacc</u> aatagcattggctt-3'                     | This study |
| 2037SmaI        | 5'-gcgttcgtttattatattttttgatactgt <u>ccggg</u> tatatctactctct-3'      | This study |
| 2066SmaI        | 5'-agacgagtagatata <u>ccggg</u> acaagtatcaaaaaatataataaacaacgaacgc-3' | This study |

|             |                                                     |            |
|-------------|-----------------------------------------------------|------------|
| 2196HindIII | 5'-gcgaagcttcgtaatgttcgaattcacttc-3'                | This study |
| 2727BamHI   | 5'-gcgggatccctcattcgaatcatacaaatcatc-3'             | This study |
| 3130BamHI   | 5'-gcgggatccctttctgttgacttaattcc-3'                 | This study |
| gfp_linker  | 5'-ggctcctgcggcgccctcatgagtaaaggagaagaac-3'         | This study |
| gfpHindIII  | 5'-gcgaagctttattgtatagttcatcc-3'                    | This study |
| tetRSaI     | 5'-cgctcgacttaggaggatgattttatgtctagattagataaaagt-3' | This study |
| tetRBamHI   | 5'-cgcgatcccgaggcgccgcaggaagaccactttcacattt-3'      | This study |
| tetOKasIF   | 5'-atcgcgccgcccgtagcggccagtgccaagccttag-3'          | This study |
| tetOKasIR   | 5'-atcgcgccgcccgtagcgtgatgcactttgatatcg-3'          | This study |

---

<sup>a</sup> Ap<sup>R</sup>, ampicillin resistance; Em<sup>R</sup>, erythromycin resistance; Gm<sup>R</sup>, gentamicin resistance; Km<sup>R</sup>, kanamycin resistance; LEU<sup>+</sup>, leucine autotrophy; Nm<sup>R</sup>, neomycin resistance; Tc<sup>R</sup>, tetracycline resistance; TRP<sup>+</sup>, tryptophan autotrophy. Nucleotide base substitutions are bolded and restriction sites are underlined. <sup>b</sup> The number refers to the 5' most base of each oligonucleotide that corresponds to pSK1 *par-rep* sequence (GenBank entry GU565967).

**Table S2:** Data collection and refinement statistics for pSK1 Par-DNA complex

| Data                                    | pSK1 Par-DNA/SAD                     | native pSK1 Par-DNA                  |
|-----------------------------------------|--------------------------------------|--------------------------------------|
| Pdb code                                |                                      | 8CSH                                 |
| Space group                             | C2                                   | C2                                   |
| Cell constants (Å)                      | a=70.9, b=91.7, c=59.0               | a=70.4, b=91.1, c=59.2               |
| Cell angles (°)                         | $\alpha=\gamma=90.0$ , $\beta=120.0$ | $\alpha=\gamma=90.0$ , $\beta=119.8$ |
| Resolution (Å)                          | 51.11-2.79                           | 51.33-2.25                           |
| $R_{\text{sym}}(\%)^a$                  | 8.3 (1.00) <sup>b</sup>              | 7.8 (56.3)                           |
| $R_{\text{pim}}(\%)$                    | 5.6 (67.6)                           | 5.6 (45.3)                           |
| Overall $1/\sigma(I)$                   | 8.4 (2.4)                            | 8.0 (2.2)                            |
| #Unique Reflections                     | 7609                                 | 13575                                |
| #Total Reflections                      | 22238                                | 36953                                |
| % Complete                              | 92.9 (95.2)                          | 94.3 (97.9)                          |
| CC(1/2)                                 | 0.997 (0.457)                        | 0.992 (0.645)                        |
| Multiplicity                            | 3.0 (3.5)                            | 2.7 (2.3)                            |
| <b>Refinement Statistics</b>            |                                      |                                      |
| Resolution (Å)                          |                                      | 51.33-2.25                           |
| $R_{\text{work}}/R_{\text{free}}(\%)^c$ |                                      | 21.4/24.6                            |
| Rmsd                                    |                                      |                                      |
| Bond angles (°)                         |                                      | 0.687                                |
| Bond lengths (Å)                        |                                      | 0.004                                |
| Ramachandran analysis                   |                                      |                                      |
| Favored (%)                             |                                      | 98.04                                |
| Disallowed(%)                           |                                      | 0.0                                  |

<sup>a</sup> $R_{\text{sym}} = \frac{\sum \sum |I_{\text{hkl}} - I_{\text{hkl}}(j)|}{\sum I_{\text{hkl}}}$ , where  $I_{\text{hkl}}(j)$  is observed intensity and  $I_{\text{hkl}}$  is the final average value of intensity. <sup>b</sup> values in parentheses are for the highest resolution shell. <sup>c</sup> $R_{\text{work}} = \frac{\sum |F_{\text{obs}} - |F_{\text{calc}}||}{\sum |F_{\text{obs}}|}$  and  $R_{\text{free}} = \frac{\sum |F_{\text{obs}} - |F_{\text{calc}}||}{\sum |F_{\text{obs}}|}$ ; where all reflections belong to a test set of 5% randomly selected data.

## Supplementary References

1. Bimboim, H.C., Doly, J., (1979). A rapid alkaline extraction procedure for screening recombinant plasmid DNA. *Nucleic. Acids. Res.* **7**, 1513-1523.
2. Sambrook, J., Russell, D.W., (2001). Molecular cloning: a laboratory manual, 3rd ed. Cold Spring Harbour Laboratory Press, Cold Spring Harbour, N. Y.
3. Brückner, R., (1992). A series of shuttle vectors for *Bacillus subtilis* and *Escherichia coli*. *Gene* **122**, 187-192.
4. Veiga, H., Jorge, A.M., Pinho, M.G., (2011). Absence of nucleoid occlusion effector Noc impairs formation of orthogonal FtsZ rings during *Staphylococcus aureus* cell division. *Mol. Microbiol.* **80**, 1366-1380.
5. Schumacher, M.A., Lee, J., Zeng, W., (2016). Molecular insights into DNA binding and anchoring by the *Bacillus subtilis* sporulation kinetochore-like RacA protein. *Nucl. Acids. Res.* **44**, 5438-5449.
6. Miroux, B., Walker, J.E., (1996). Over-production of proteins in *Escherichia coli*: mutant hosts that allow synthesis of some membrane proteins and globular proteins at high levels. *J. Mol. Biol.* **260**, 289-298.
7. Kreiswirth, B.N., et al., (1983). The toxic shock syndrome exotoxin structural gene is not detectably transmitted by a prophage. *Nature* **305**,709-712.
8. Lau, I.F., Filipe, S.R., Søballe, B., Økstad, O.A., Barre, F.X., Sherratt, D.J., (2003). Spatial and temporal organization of replicating *Escherichia coli* chromosomes. *Mol. Microbiol.* **49**,731-743.
9. Liew, A.T.F., et al., (2011). A simple plasmid-based system that allows rapid generation of tightly controlled gene expression in *Staphylococcus aureus*. *Microbiology* **157**,666-676.
10. Brückner, R., (1992). A series of shuttle vectors for *Bacillus subtilis* and *Escherichia coli*. *Gene*, **122**,187-192.
11. Jensen, S.O., Apisiridej, S., Kwong, S.M., Yang, Y.H., Skurray, R.A., Firth, N., (2010). Analysis of the prototypical *Staphylococcus aureus* multiresistance plasmid pSK1. *Plasmid* **64**,135-142.
12. Firth, N., et al., (2000). Replication of staphylococcal multiresistance plasmids. *J. Bacteriol.* **182**,2170-2178.
13. Brzoska, A.J., Firth, N., (2013). Two-plasmid vector system for independently controlled expression of green and red fluorescent fusion proteins in *Staphylococcus aureus*. *Appl. Environ. Microbiol.* **79**,3133-3136.
